# Supplementary material
Source: PubMed Central journal article supplement (PMC6501566)
Supplement: NIHMS1024452-supplement-Supporting_Information.pdf [file NIHMS1024452-supplement-Supporting_Information.pdf]

## SUPPORTING INFORMATION

Identification of Cleavable and Non-Cleavable Chemical Crosslinked Peptides with  
MetaMorpheus

*Lei Lu<sup>1</sup>, Robert J. Millikin<sup>1</sup>, Stefan K. Solntsev<sup>1</sup>, Zach Rolfs<sup>1</sup>, Mark Scalf<sup>1</sup>, Michael R. Shortreed<sup>1</sup>,  
Lloyd M. Smith<sup>\*1,2</sup>*

Department of Chemistry<sup>1</sup>, and Genome Center of Wisconsin<sup>2</sup>, University of Wisconsin,  
Madison, Wisconsin 53706, United States

\*Corresponding Author

### **Table of Contents**

S-1: Cover sheet, Table of Contents

S-2: Supplementary Methods

S-4: SI Figure S-1. Example explanation of MetaMorpheusXL's workflow.

S-5: Supplementary Figure S-2. Computation time comparison between MetaMorpheusXL and  
XlinkX 2.0.

S-6: Supplementary Figure S-3. Circle plot from ProXL displays crosslinks of DSSO crosslinked  
ribosome proteins.

S-7: Supplementary Figure S-4. Examples of annotated spectra from *E. coli* ribosome data with  
different numbers of identified signature ions (4 to 0) and from different score ranges (high to  
low).

S-10: Supplementary Figure S-5. Identification of intra-protein crosslinks composed of  
consecutive sequences.

S-11: Supplementary Table-S1. Parameter usage for MetaMorpheusXL.

S-14: MetaMorpheusXL user manual.

## Supplementary Methods

**1. Ion-indexing:** An “open-mass” search (i.e., when the precursor mass does not limit the space of theoretical peptides for fragment matching) with an ion-indexing strategy is used in MetaMorpheusXL. In this algorithm, the protein database is digested *in silico* and the digestion products (theoretical peptides) are written to a peptide index with each unique peptide being identified by an integer value (“ID”). The peptides are ordered by mass and each is fragmented *in silico*. For each theoretical fragment, its peptide’s ID is stored in a lookup table according to the fragment mass (rounded to the nearest mDa). Experimental fragments are matched to theoretical peptides by finding the experimental fragment’s mass in the lookup table. The peptide IDs in the fragment mass bin are filtered by the desired precursor mass tolerance (for completely open-mass searches, this tolerance is infinity and all peptides in the bin are counted as having matched to that experimental fragment ion).

**2. Calibration:** The mass accuracy of MS1 and MS2 spectra gathered during a proteomics experiment can vary significantly over the course of a single run and over the course of several runs. Systematic drift, random noise, and changes in temperature and other environmental conditions can contribute to this variation. Therefore, spectral mass calibration prior to the final analysis can improve peptide identification accuracy. MetaMorpheus uses a machine-learning algorithm to calibrate both MS1 and MS2 spectra. The process begins with a preliminary search of the uncalibrated file to identify a set of confident peptide spectral matches. Mass spectral peaks of confident PSMs are the calibration points, accompanied by several additional values, including: the difference between observed  $m/z$  and theoretical  $m/z$  (the “ $m/z$  error”), the absolute  $m/z$ , the retention time, the total ion current, and the ion injection time. All of these values serve as input to a random forest machine-learning algorithm that performs a regression analysis to model the  $m/z$  error as a function of the above explanatory variables. This function is

used to shift the  $m/z$  of all peaks in all scans in the run. The calibrated spectra file is then used for a complete proteomics analysis.

**3. FDR estimation:** The q-value for each CSM is determined by calculating the ratio of the count of CSMs assigned to target by the count of CSMs assigned to decoy with scores greater than or equal to the current CSM ( $q\text{-value} = (\text{target count})/(\text{decoy count})$ ). In MetaMorpheusXL, a CSM is assigned as a target only when both peptides of the crosslink pair are present in the target database. When either member or both of a crosslink pair are present in the decoy database, the CSM is assigned as a decoy. This results in an imbalance in the total number of target and decoy pairs, which makes it more likely for a CSM to be assigned as a decoy than a target compared to a typical target-decoy search. Therefore, it is possible for the q-value to exceed 1.

**4. Example explanation of MetaMorpheusXL's workflow: SI Figure S-1** An illustration of the algorithm used by MetaMorpheusXL to identify a peptide crosslink. This example uses a high-quality MS2 spectrum from a BSA sample crosslinked with DSS. The MS2 spectrum was obtained from a precursor species with a mass of 2293.105 Da. MetaMorpheusXL first finds all candidate peptides by matching primary fragment ions using an indexed-ion open search method (see the *Ion-Indexing* section of this supplement). All possible peptide matches are then paired with each other to generate candidates for crosslink pairs. A candidate pair is valid if the summed mass of the two peptides and the crosslink molecule matches the precursor mass. For example, PSM 1 and PSM 3 in the top panel of **SI Figure S-1** are considered a valid candidate pair because the summed mass of the two peptides and the crosslinker (1165.486 Da + 989.551 Da + 138.068 Da) are within the tolerance of precursor mass (2293.105 Da  $\pm$  10 ppm). Theoretical ions containing crosslinker-specific modifications are then generated for each crosslink candidate pair and matched to the spectrum; the highest-scoring (the CSM with the most matching fragments) is retained.

**SI Figure S-1.** Example of a crosslinked peptide identified by MetaMorpheusXL. The MS2 spectrum's precursor mass is 2293.105 Da. Preliminary peptide matches are generated with an open-mass search. The candidate PSM masses are paired, with a valid pair satisfying the equation  $M_{\text{precursor}} = M_{\text{alpha}} + M_{text{beta}} + M_{\text{crosslinker}}$ . The highest-scoring pair that satisfies this constraint was PSM 1 (CCTKPESER) paired with PSM 3 (EKVLTSSAR). Fragment ions containing peptide crosslinks are discovered during an additional processing and the CSM score is increased by one for each additional fragment ion matches.

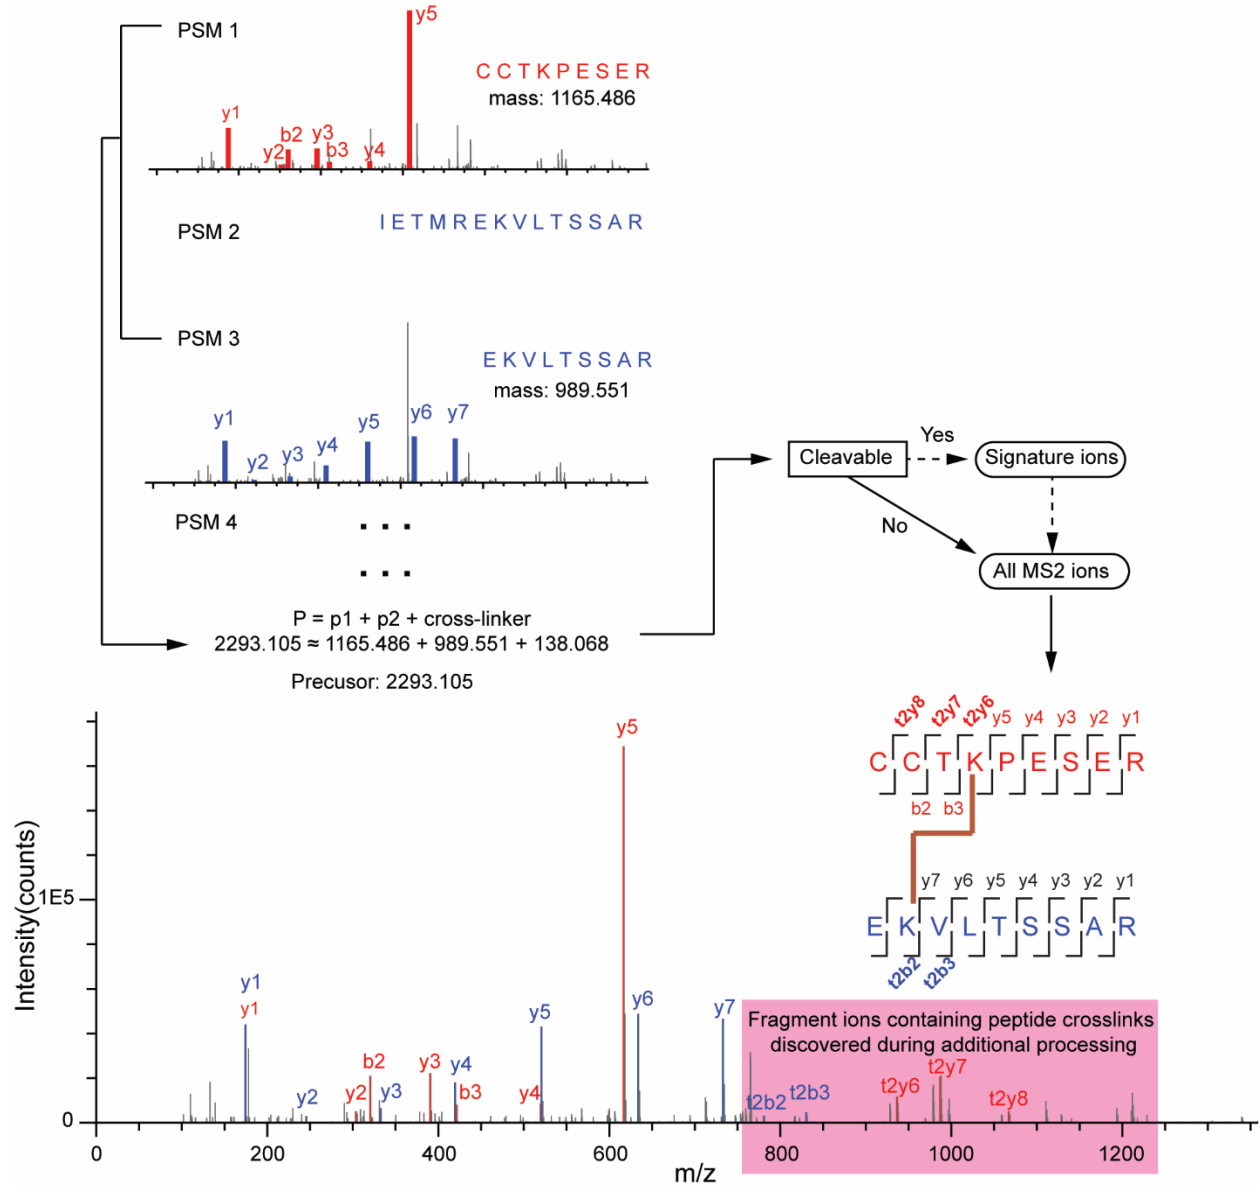

**SI Figure S-2.** Computation time comparison between MetaMorpheusXL and XlinkX 2.0. (a)

Computation time comparison for searching BSA and ribosome data using small theoretical

databases. (b) Computation times and numbers of CSMs identified when searching ribosome

data against the entire *E. coli* proteome database, which contains 4443 proteins.

MetaMorpheusXL took 6.4 min when restricted to the top 500 peptide matches per MS2

spectrum and identified 173 inter- and intra-CSMs combined, 35% less than the 262 inter- and

intra-CSMs identified using the restricted database. Only 3 identified proteins were not

ribosomal or ribosome-related. XlinkX 2.0 took 6.5 min and identified 66 CSMs, among which 21

proteins were not ribosomal or ribosome-related. Searches with MeroX and DXMSMS using the

whole *E. coli* proteome database took too long to evaluate the results.

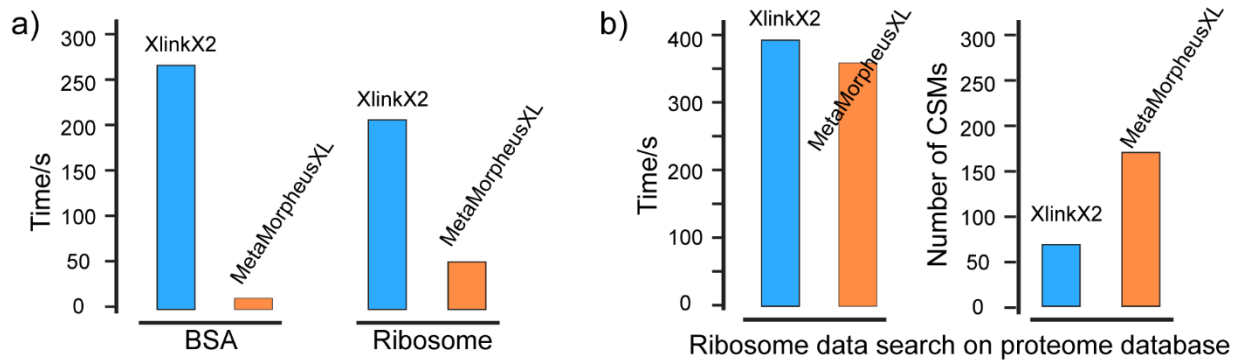



**SI Figure S-4.** Examples of annotated spectra from *E. coli* ribosome data with different numbers of identified signature ions (4 to 0) and from different score ranges (high to low). The “PepS” or “PepL” annotations indicate signature ions containing the short or long pieces of the fragmented MS-cleavable crosslinker molecule. “PepS2” indicates a doubly-charged signature ion with a short crosslinker piece. The “lb4” and “sb4” refer to b4 ions with long or short cleavage products, respectively. (a) This CSM contains 4 signature ions with a high score. (b) This CSM contains 3 signature ions. (c) This CSM contains 2 signature ions, both of which are from the alpha peptide. (d) This CSM contains 1 signature ion from its alpha peptide. (e) This CSM contains no signature ions. (f) This CSM contains no signature ions and is low-scoring.

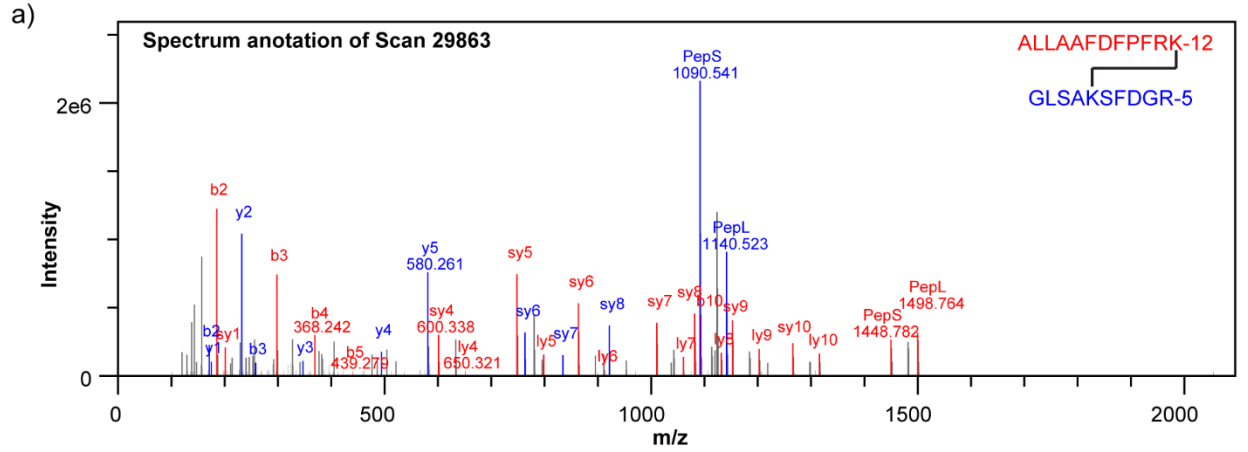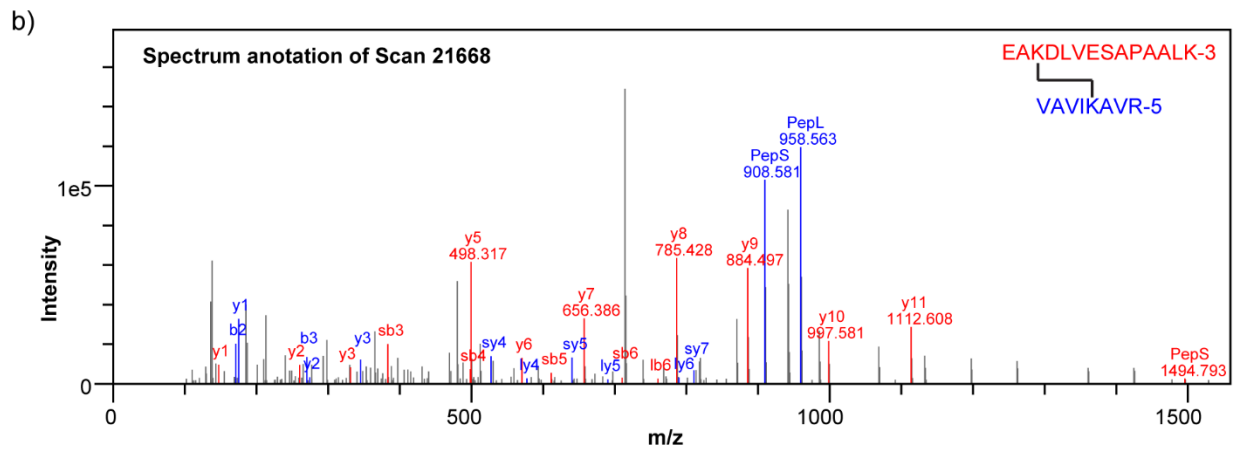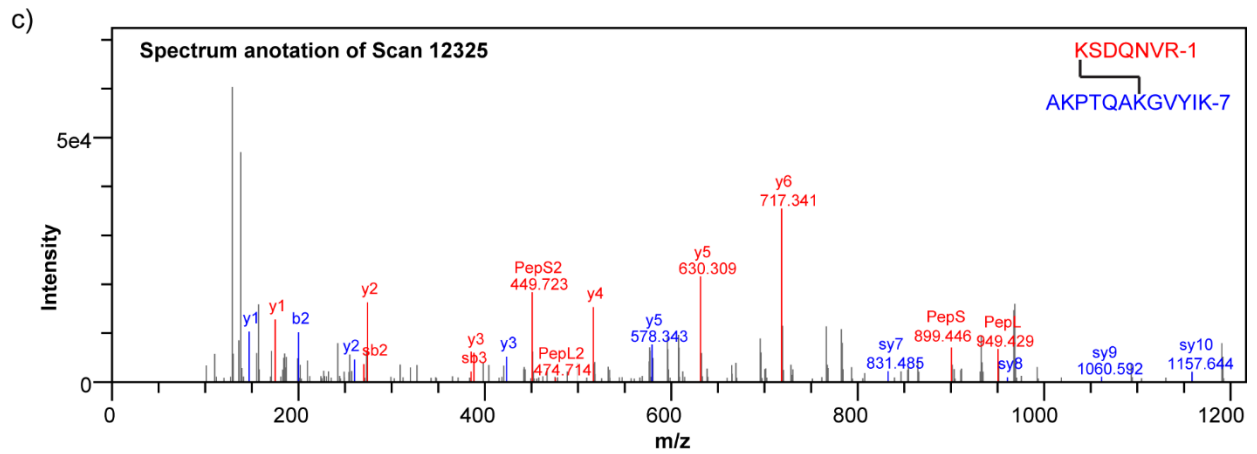



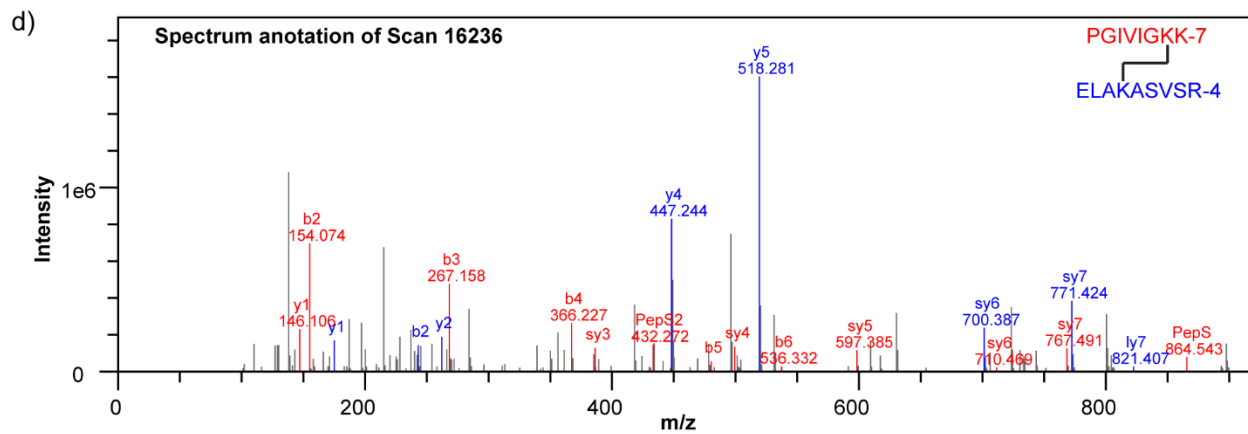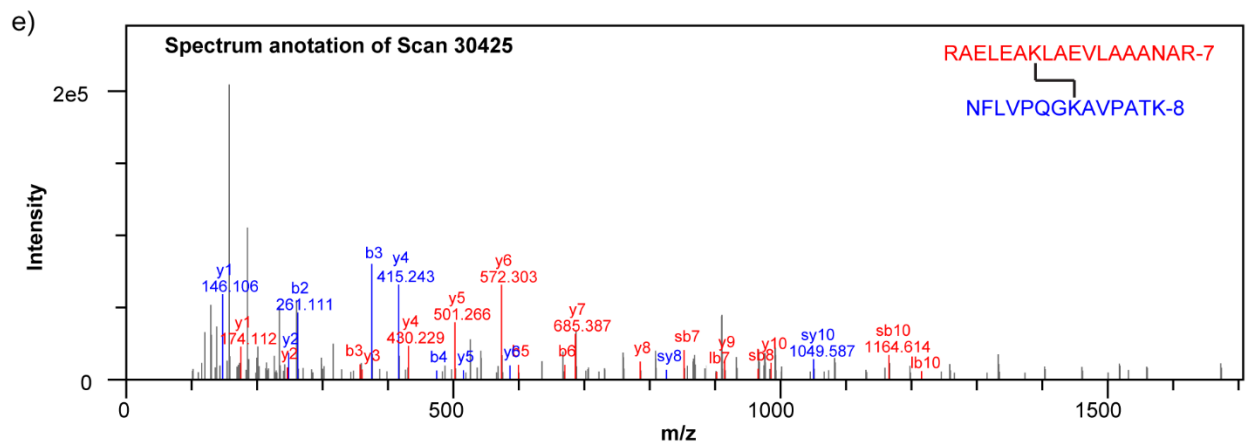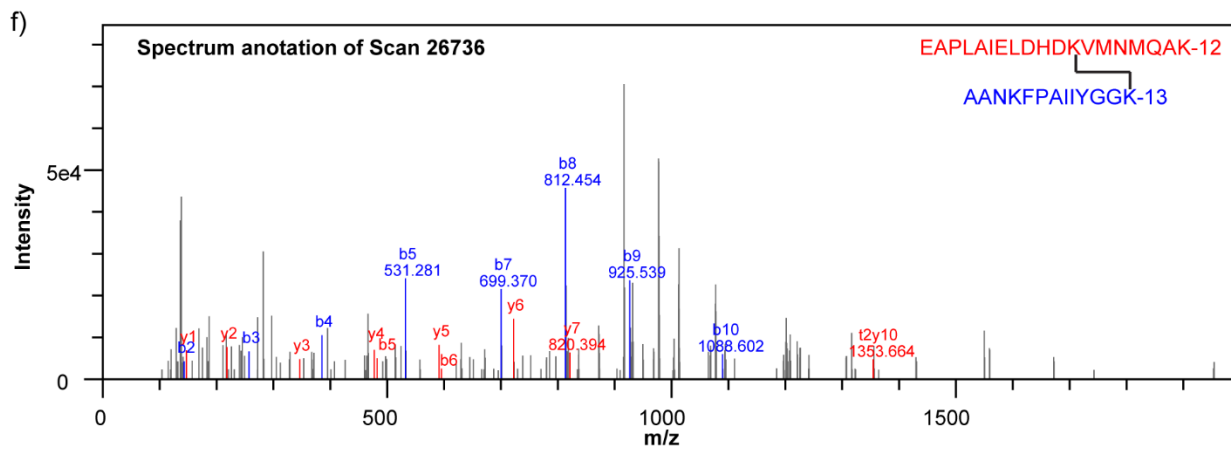

**SI Figure S-5.** Identification of intra-protein crosslinks composed of consecutive sequences. (a) Intra-crosslinks composed of consecutive sequences (left) have the same precursor mass as the dead-end missed-cleavage product modified with hydrolyzed crosslinker (right). (b) MetaMorpheusXL assigns a crosslink composed of consecutive sequences as an intra-crosslink only if the matched fragment ions could differentiate it from the dead-end crosslink. From the ribosome data, an intra-crosslink composed of consecutive sequences ‘EAFKLAAAK’ and ‘LPIKTTFVTK’ of protein P0ADY7 are shown as an example here. The spectral matches containing indicative fragment ions (e.g., the y2 ion of ‘EAFKLAAAK’) support that the pair is an intra-crosslink instead of dead-end missed-cleavage product.

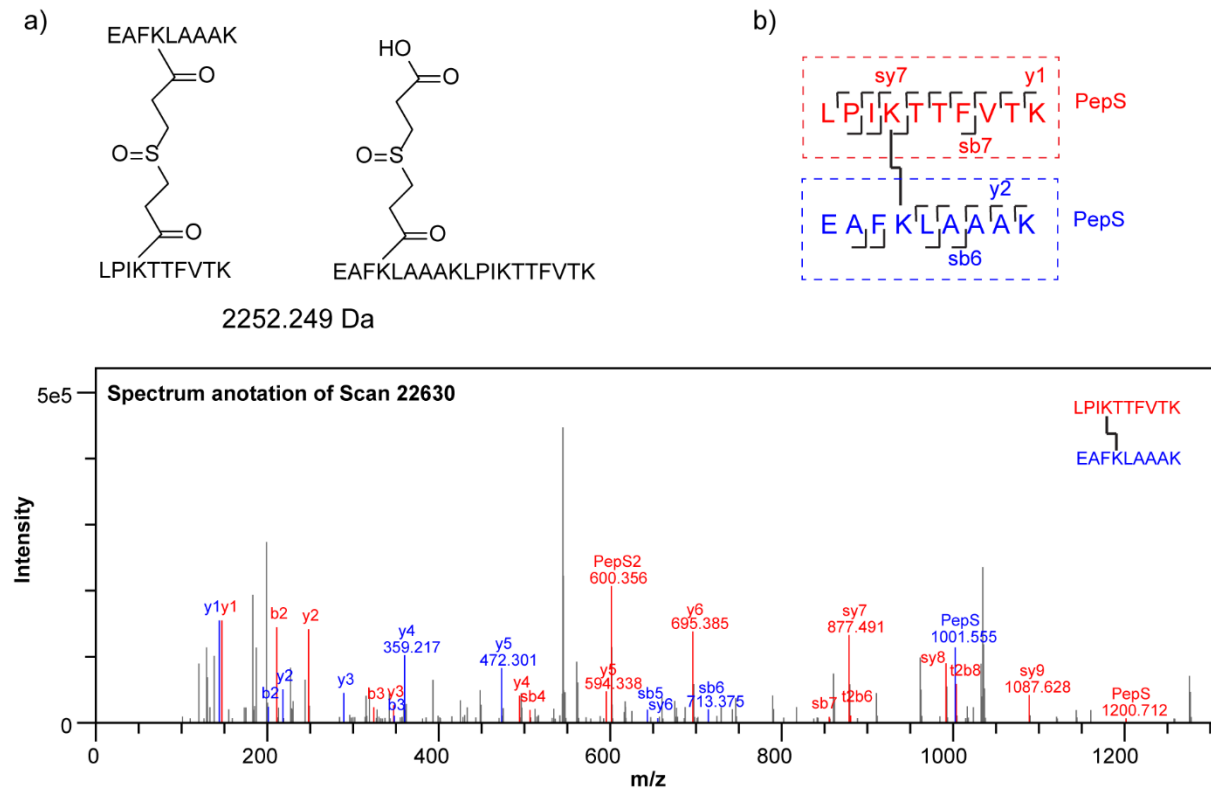

**SI Table-1.** Parameters used in this work for searches of crosslinked data with MetaMorpheusXL, XLinkX 2.0 and Kojak 1.5.

**MetaMorpheusXL parameters**

*Crosslinker type:* The crosslinker molecule used in the sample; can be user defined.

*Search top matches:* if selected, MetaMorpheusXL will only consider N top-scoring peptides for peptide pairing.

*Search top Num:* used together with ‘Search top matches’; this defines the N top peptide candidates.

*Trim MS/MS peaks:* only match the most intense peaks in an MS2 spectrum. Used together with ‘Top N peaks’ (i.e., N most intense peaks) and ‘Minimum ratio’ (peaks must be this intense compared to the base peak).

*Minimum Score allowed:* the lowest peptide score after the ‘first pass’ that will be considered.

| parameters                | Cleavable            | Non-cleavable        |
|---------------------------|----------------------|----------------------|
| Precursor Mass tolerance  | 10 ppm               | 10 ppm               |
| Crosslinker type          | DSSO                 | DSS                  |
| Search top matches        | -                    | ✓                    |
| Search top Num            | -                    | 300                  |
| Use Provided Precursor    | ✓                    | ✓                    |
| Deconvolute Precursor     | ✓                    | ✓                    |
| Trim MS1 Peaks            | -                    | -                    |
| Trim MS/MS Peaks          | ✓                    | ✓                    |
| Top N Peaks               | 200                  | 500                  |
| Minimum ratio             | 0.01                 | 0.005                |
| Generate decoy proteins   | ✓                    | ✓                    |
| Max missed cleavages      | 2                    | 2                    |
| protease                  | trypsin              | trypsin              |
| Initiator methionine      | Variable             | Variable             |
| Max modification isoforms | 4096                 | 4096                 |
| Min peptide length        | 5                    | 5                    |
| Product mass tolerance    | 20 ppm               | 20 ppm               |
| Ions to search            | B ions, Y ions       | B ions, Y ions       |
| Minimum Score allowed     | 5                    | 2                    |
| Fixed modification        | Carbamidomethyl of C | Carbamidomethyl of C |
| Variable modification     | Oxidation of M       | Oxidation of M       |
| Localize all modification | ✓                    | ✓                    |
| Output for Percolator     | -                    | ✓                    |

|                      |   |   |
|----------------------|---|---|
| Output for Crosslink | ✓ | ✓ |
|----------------------|---|---|

### Parameters used in XlinkX2.0

XlinkX 2.0 was used as a node in Thermo Scientific Proteome Discoverer 2.2. Parameters used in XlinkX 2.0 are listed below.

XlinkX 2.0 Detection  
Acquisition strategy: MS2  
Crosslink Modification: DSSO / + 158.004 Da (K)  
Minimum S/N: 1.5  
Enable protein N-terminus linkage: false  
Xlinkx Filter  
Select: Crosslinks  
Xlinkx Search  
Retain FASTA file indexes: True  
Enzyme Name: Trypsin(full)  
Maximum Missed Cleavages: 2  
Maximum Peptides Considered: 10  
Minimum Peptide Length: 5  
Maximum Number Modifications: 3  
Minimum Peptide Mass: 300  
Maximum Peptide Mass: 7000  
Precursor Mass Tolerance :10 ppm  
FTMS Fragment Mass Tolerance: 20 ppm  
Static Modification: Carbamidomethyl / + 57.021 Da (C)  
Dynamic Modification: Oxidation /+ 15.995 Da (M)  
FDR threshold: 0.01  
FDR strategy: Percolator

### 3.3 Parameter used in Kojak1.5

percolator\_version = 3.0  
enrichment = 0  
instrument = 0  
MS1\_centroid = 1  
MS2\_centroid = 1  
MS1\_resolution = 100000  
MS2\_resolution = 7500  
cross\_link = nK            nK 138.0680742 DSS  
mono\_link = nK 156.0786  
fixed\_modification = C 57.02146  
fixed\_modification\_protC = 0  
fixed\_modification\_protN = 0  
modification = M 15.9949  
modification\_protC = 0  
modification\_protN = 0  
diff\_mods\_on\_xl = 0

max\_mods\_per\_peptide = 2  
mono\_links\_on\_xl = 0  
enzyme = [KR]{P}  
fragment\_bin\_offset = 0.0  
fragment\_bin\_size = 0.03  
ion\_series\_A = 0  
ion\_series\_B = 1  
ion\_series\_C = 0  
ion\_series\_X = 0  
ion\_series\_Y = 1  
ion\_series\_Z = 0  
decoy\_filter = DECOY  
isotope\_error = 1  
max\_miscleavages = 2  
max\_peptide\_mass = 8000.0  
min\_peptide\_mass = 500.0  
max\_spectrum\_peaks = 0  
ppm\_tolerance\_pre = 10.0  
prefer\_precursor\_pred = 2  
spectrum\_processing = 0  
top\_count = 300  
truncate\_prot\_names = 0  
turbo\_button = 1

## MetaMorpheusXL User Manual

1. Download the current version of MetaMorpheus from <https://github.com/smith-chem-wisc/MetaMorpheus/releases>. MetaMorpheusInstaller.msi is suggested for Windows users.
2. Double-click the .msi file to install MetaMorpheus. Open MetaMorpheus after installation.
3. Click the 'New XL Task'. This will open a window to set the parameters for a new crosslink search. Parameters are described in this document, below. After choosing your parameters, click 'Add the XLSearch Task'.

### Crosslink Search panel:

- 'Crosslink Precursor mass tolerance': Sets precursor mass tolerance, in Daltons (Da) or parts per million (ppm).
- 'Crosslinker Type': choose the crosslinker used in your sample. If 'UserDefined' is chosen, additional crosslinker information must be specified.
- 'Search Top matches': this option can help speed up searches. This option defines the number of peptides from the open search to pair.

### Search Parameters panel:

- 'Ions to search': Ion types should be specified to match the fragmentation method (e.g., b and y ions for HCD data).
  - When searching a whole proteome database, selecting 'Search Top matches' is recommended, along with setting the number of database partitions to ~4-8.
4. Drag your database and spectra files into MetaMorpheus and click 'Run All tasks'. The results will be in the same folder as the data files.
  5. If you have any problems, support is available by reading the wiki ([Help -> Open Wiki page](#)), opening an issue on GitHub ([Help -> Submit an issue on GitHub](#)), or by emailing the MetaMorpheus development team at [mm\\_support@chem.wisc.edu](mailto:mm_support@chem.wisc.edu).
